# Supplementary material
Source: PubMed Central journal article supplement (PMC7239567)
Supplement: NIHMS1587064-supplement-Supplementary_Information_File.pdf [file NIHMS1587064-supplement-Supplementary_Information_File.pdf]

## Supplementary Information

### **CpG Molecular Structure Controls Mineralization of Calcium Phosphate**

### **Nanoparticles and their Immunostimulation Efficacy as Vaccine Adjuvants**

**Razieh Khalifehzadeh<sup>a,b,#</sup>, Hamed Arami<sup>b,c,#,\*</sup>**

<sup>a</sup> Department of Chemical Engineering, Stanford University, Shriram Center, 443 Via Ortega, Stanford, California 94305, United States

<sup>b</sup> Department of Radiology, Stanford University School of Medicine, James H. Clark Center, 318 Campus Drive, E-153, Stanford, California 94305, United States

<sup>c</sup> Molecular Imaging Program at Stanford (MIPS), Stanford University School of Medicine, James H. Clark Center, 318 Campus Drive, E-153, Stanford, California 94305, United States

# These authors contributed equally.

\* Corresponding author (E-mail address: arami1@stanford.edu)

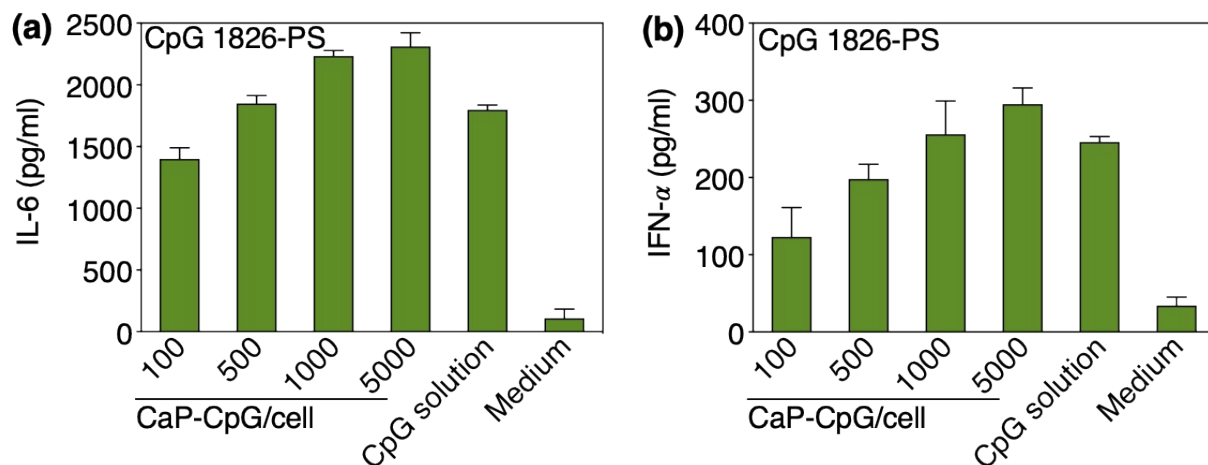

**Fig. S1.** Immunostimulatory effect of the CaP's formed in the presence of CpG 1826-PS (40  $\mu\text{g}/\text{mL}$ ). The IL-6 and IFN- $\alpha$  values were almost similar to free CpG-1826-PS, indicating these nanoparticles did not induce considerable immunostimulation. There was not statistically significant differences between free CpG-1826-PS as compared to all other samples tested here.

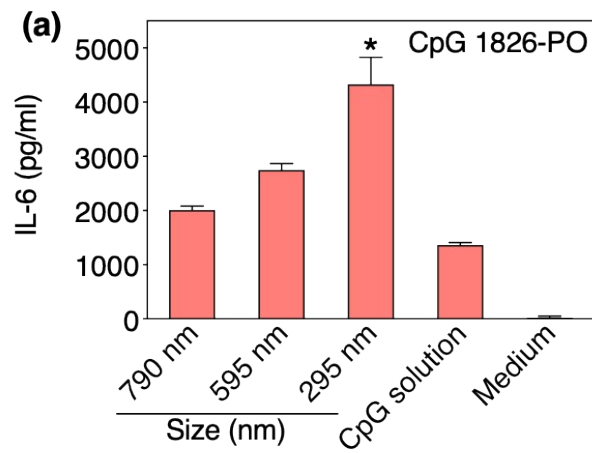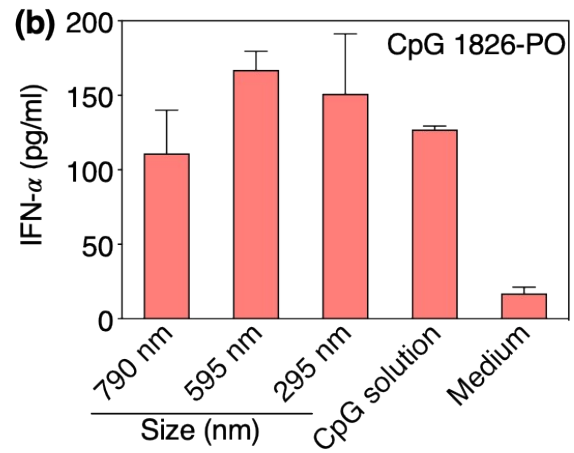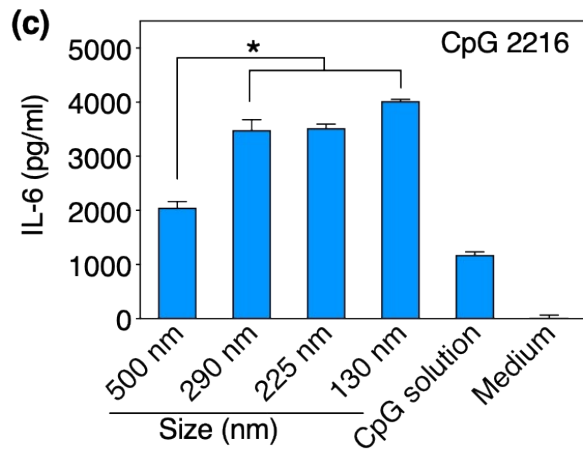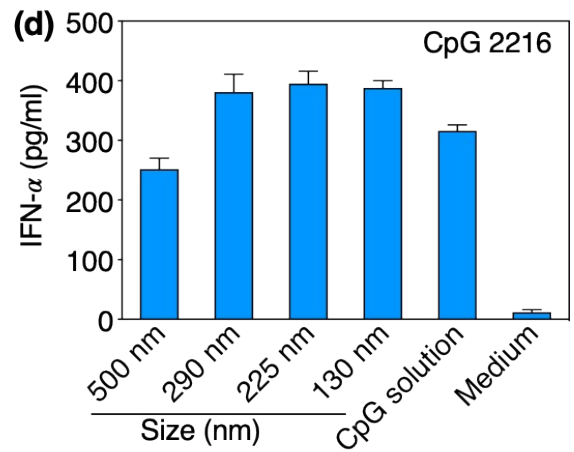

**Fig. S2.** The effect of hydrodynamic size on immunostimulation performance of CaP's mineralized in the presence of CpG 1826-PO (a and b) or CaP CpG 2216 (c and d) [CaP-CpG/cell ratio ~ 1000]. CaP's with larger hydrodynamic sizes had relatively lower immunostimulation, due to their reduced uptake. The asterisk denotes the significantly greater amount of IL-6 production as compared to all other samples ( $\alpha = 0.05$ ). There was no statistically significant difference in IL-6 production between nanoparticles smaller than 290 nm shown in part (c).
